# Supplementary material
Source: MDPI journal article supplement (https://www.mdpi.com/2079-6412/9/1/46)
Supplement: s1 [file s1]

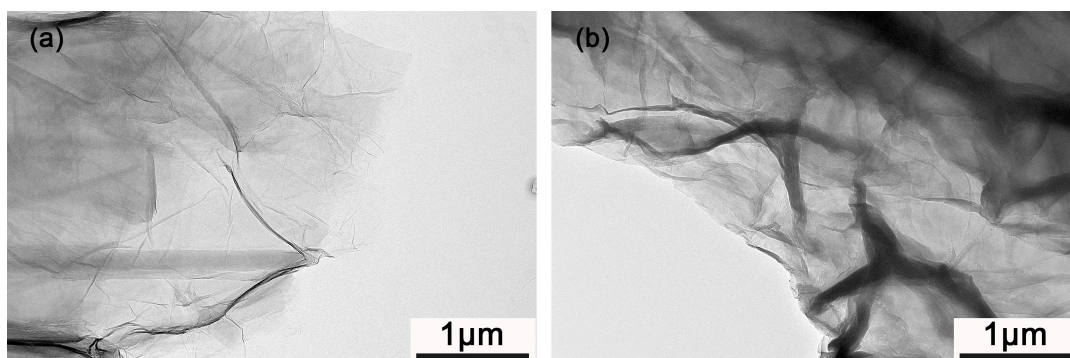

**Figure S1.** TEM images of (a) GO and (b) ETEO-GO.

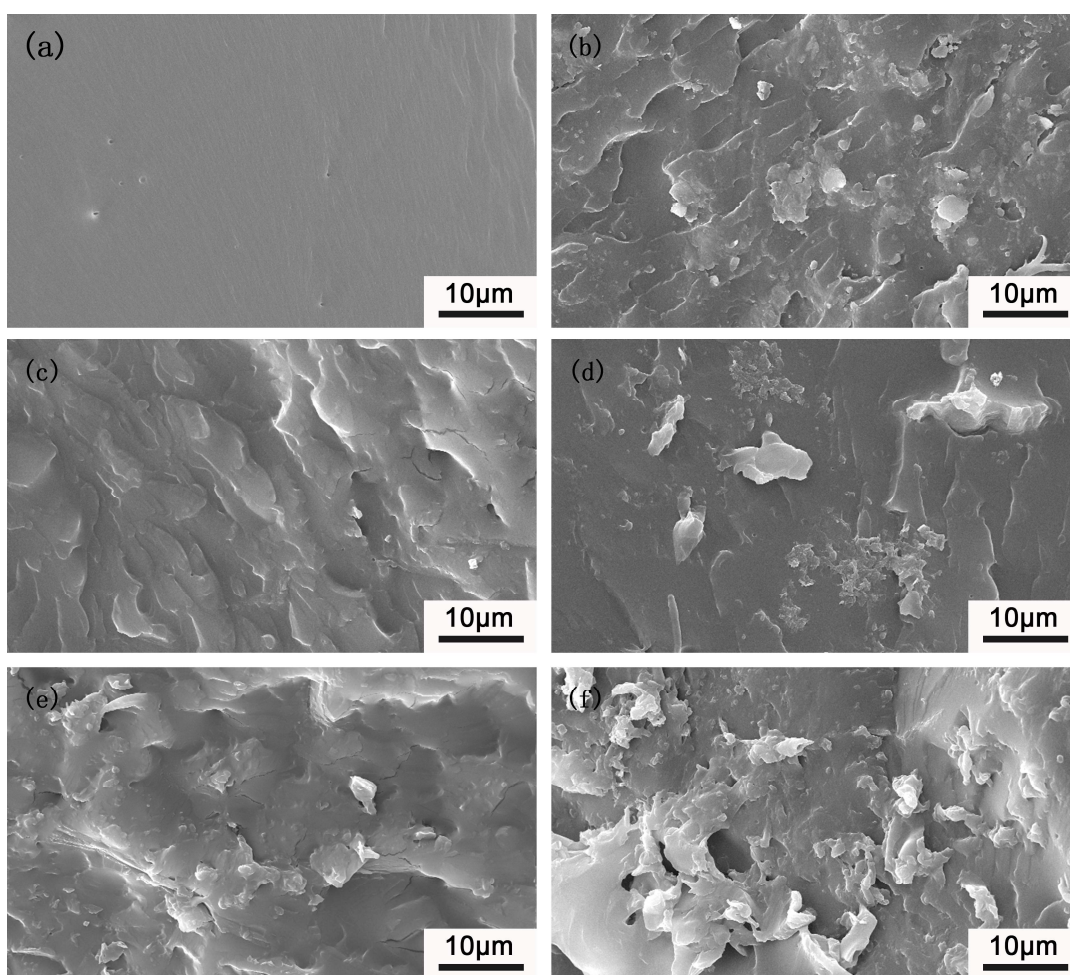

**Figure S2.** SEM images of cross-section microstructures for smaller magnifications: (a) EP; (b) GO; (c) EGO1; (d) EGO2; (e) EGO3; and (f) EGO4.
